# Supplementary material
Source: Springer Nature journal article supplement (https://www.springermedizin.de/resource/supplementary/13054_2013_2509_MOESM3_ESM.pdf/9714166)

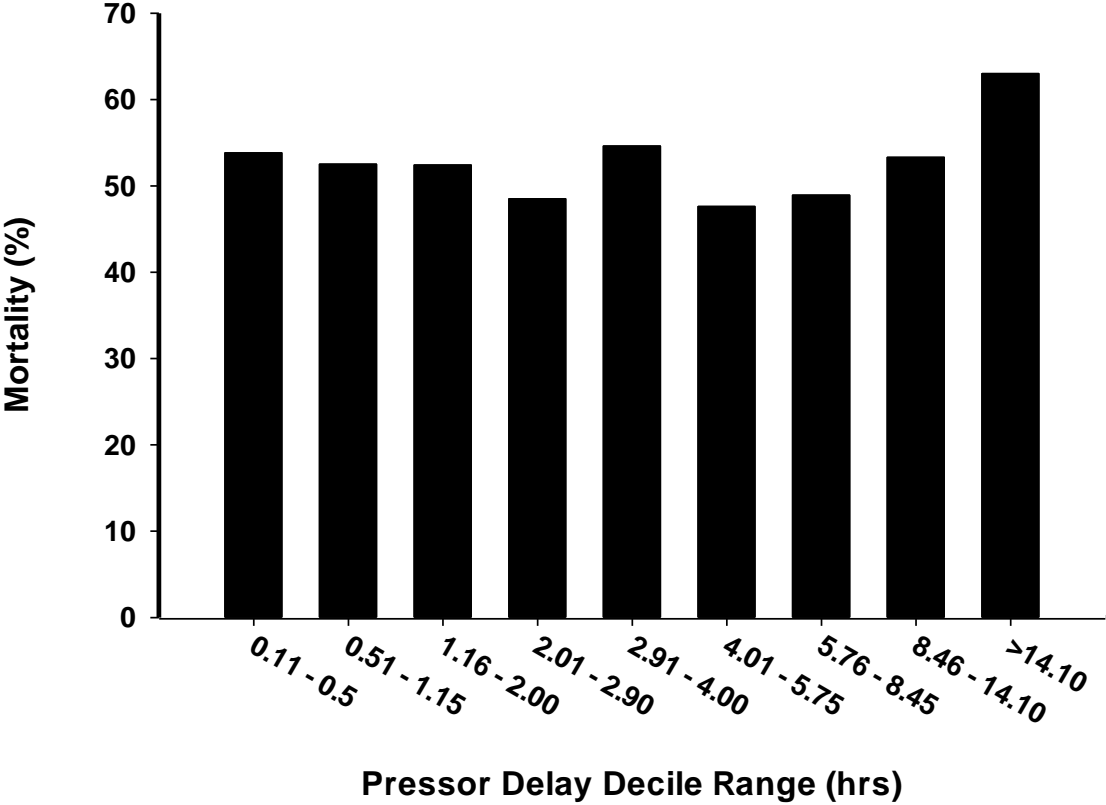

Supplement: MOESM3 [file 9714166]
